# Supplementary material for: Simple and efficient synthesis methods for fabricating anode materials of sodium-ion batteries and their sodium-ion storage mechanism study
Source: Royal Society of Chemistry journal article supplement (doi:10.1039/d2ta09051a), 2023-01-01
Supplement: d2ta09051a1.pdf [file d2ta09051a1.pdf]

## Supporting information

Simple and efficient synthesis methods for fabricating anode materials  
of sodium-ion batteries and their sodium-ion storage mechanism study

Pan Zhang<sup>1,2</sup>, Yirui Shu<sup>1,2</sup>, Ye Wang<sup>1,2</sup>, Jinghua Ye<sup>1,2</sup> and Lin Yang<sup>\*1,2</sup>

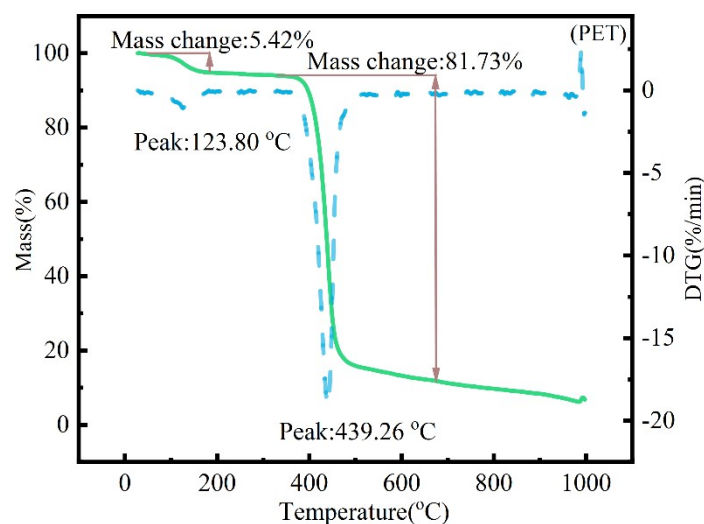

Fig.S1 TG analysis of the PET raw material.

- 
1. Chemical Science and Engineering College, Sichuan University, Chengdu 610065, China, P R
  2. Engineering Research Center of Comprehensive Utilization and Clean Processing of Phosphorus, Chengdu 610065, China, P R

\*Corresponding author: Lin Yang; TEL: +862885405201; E-mail: 18980632893@163.com

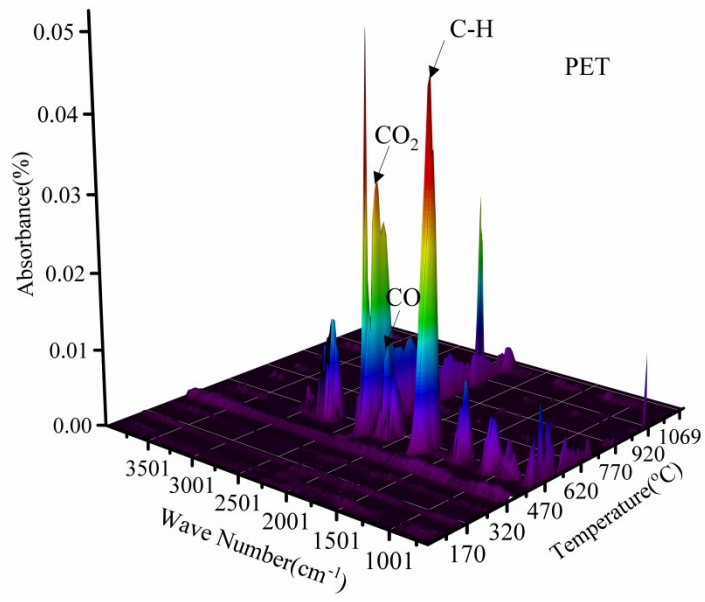

Fig.S2 FTIR analysis of the PET raw material .

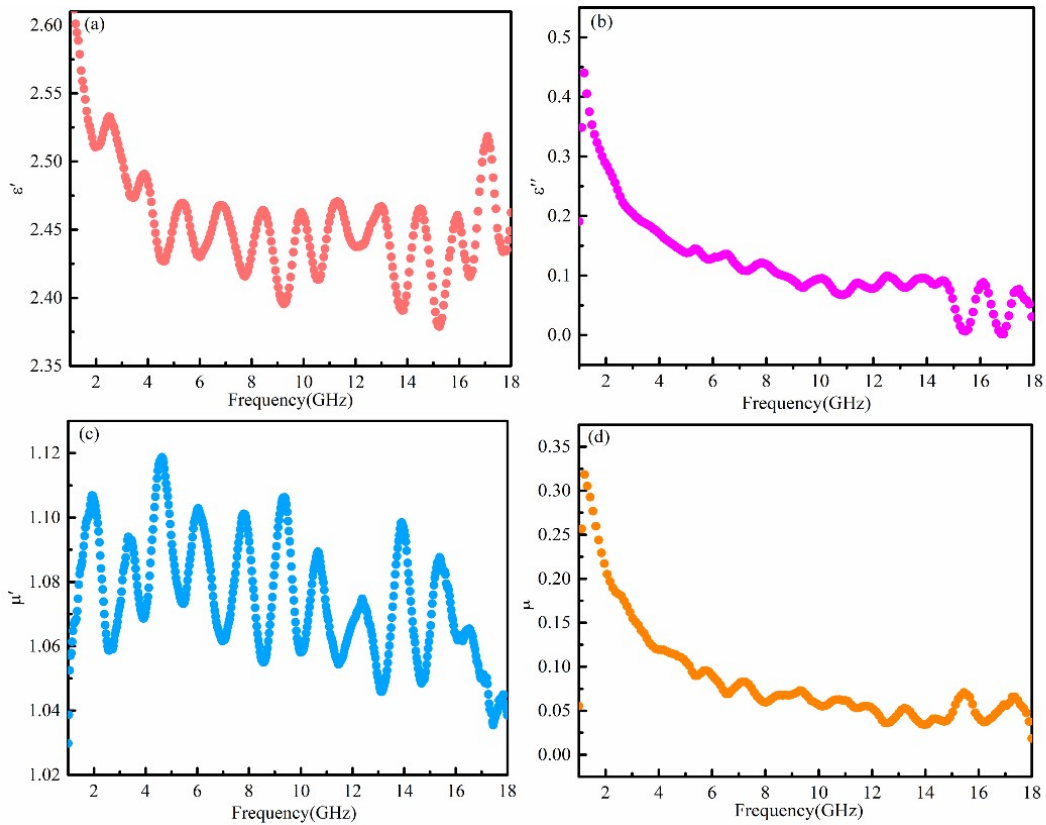

Fig.S3 Electromagnetic parameters of PET:(a)Real part( $\epsilon'$ ) and (b)imaginary part( $\epsilon''$ ) of the complex permittivity;(c)Real part( $\mu'$ );(d)imaginary part( $\mu''$ )of the permeability.

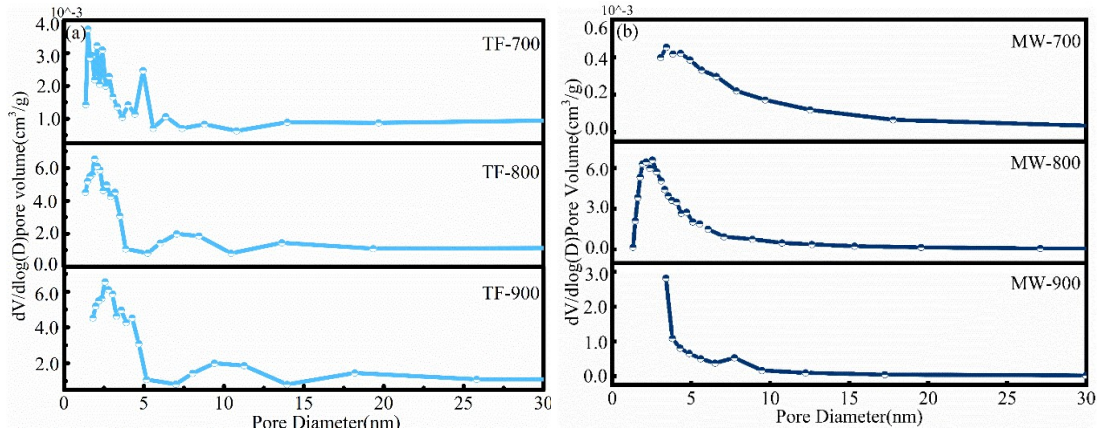

Fig.S4 The corresponding pore size distributions of TF-HC(a),and MW-HC(b).

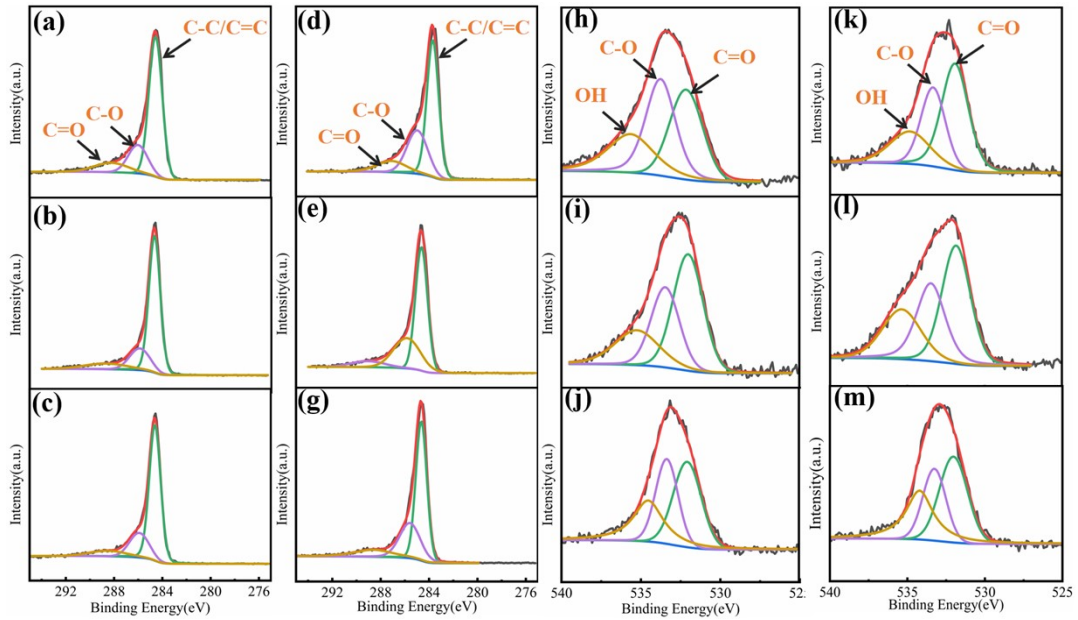

Fig.S5 XPS of spectra of TF-HC and MW-HC at different temperatures:(a-g) C 1s peak of TF-700, TF-800, TF-900 and MW-700, MW-800,MW-900; (h-m) O 1s peak of TF-700, TF-800, TF-900 and MW-700, MW-800, MW-900.

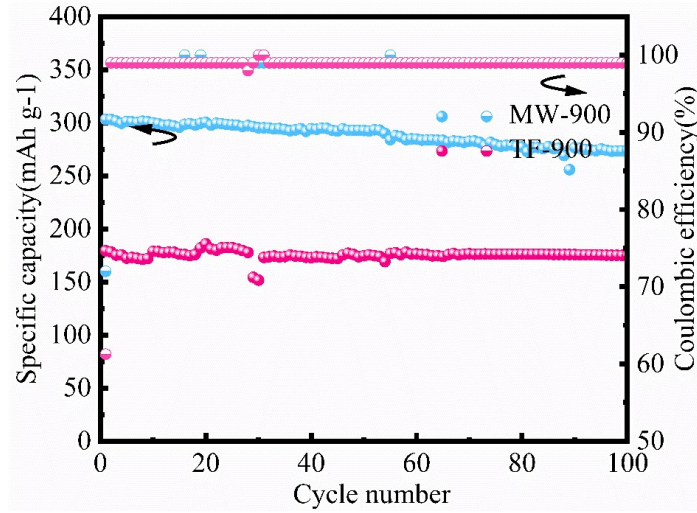

Fig.S6 Cycling performance of TF-900 and MW-900

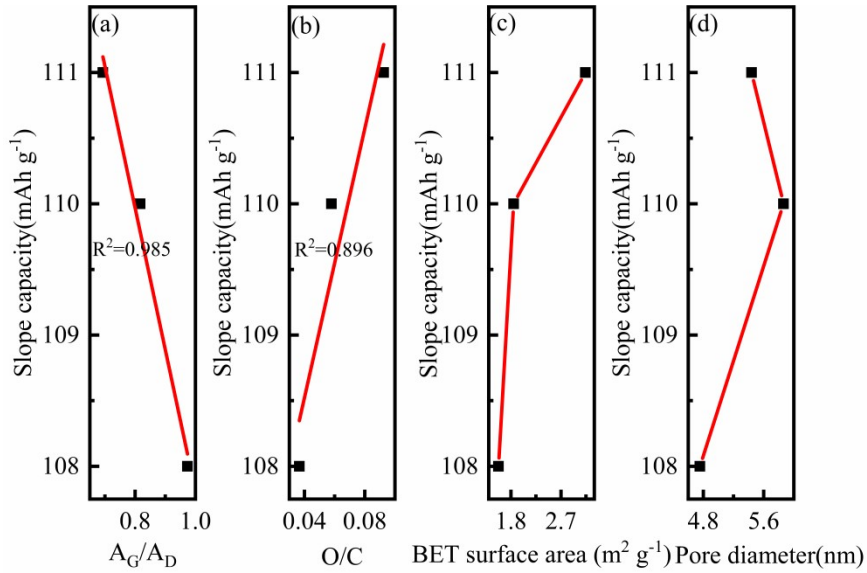

Fig.S7 Relation curves of the slope capacities of TF-HC(TF-700、TF-800、TF-900): (a) the  $A_G/A_D$  ratios from the previous Raman spectra, (b) the atomic ratios of oxygen over carbon from the previous XPS spectra, (c) the BET surface areas, (d) the pore diameter from the previous BET tests. it can be seen that the open pores may improve the adsorption of  $\text{Na}^+$ .

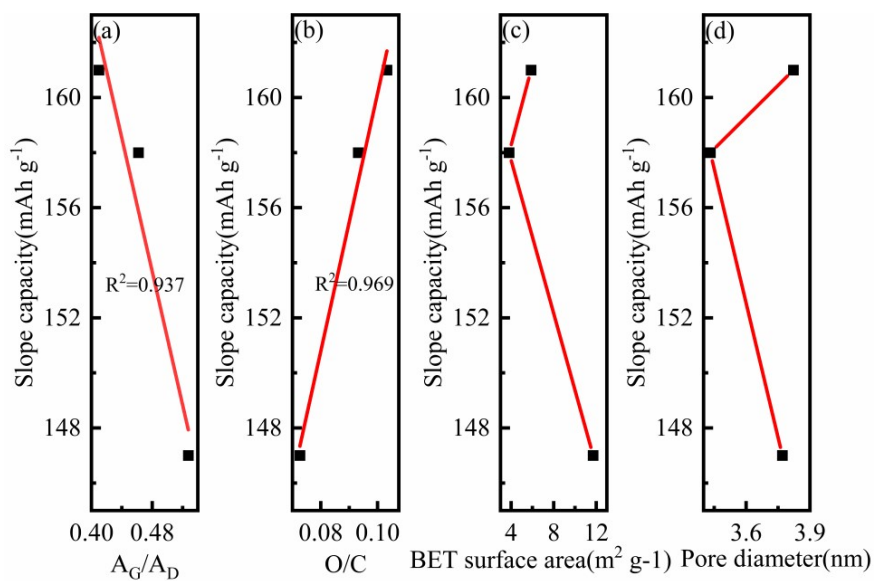

Fig.S8 Relation curves of the slope capacities of MW-HC (MW-700、MW-800、MW-900): (a) the  $A_G/A_D$  ratios from the previous Raman spectra, (b) the atomic ratios of oxygen over carbon from the previous XPS spectra, (c) the BET surface areas, (d) the pore diameter from the previous BET tests.

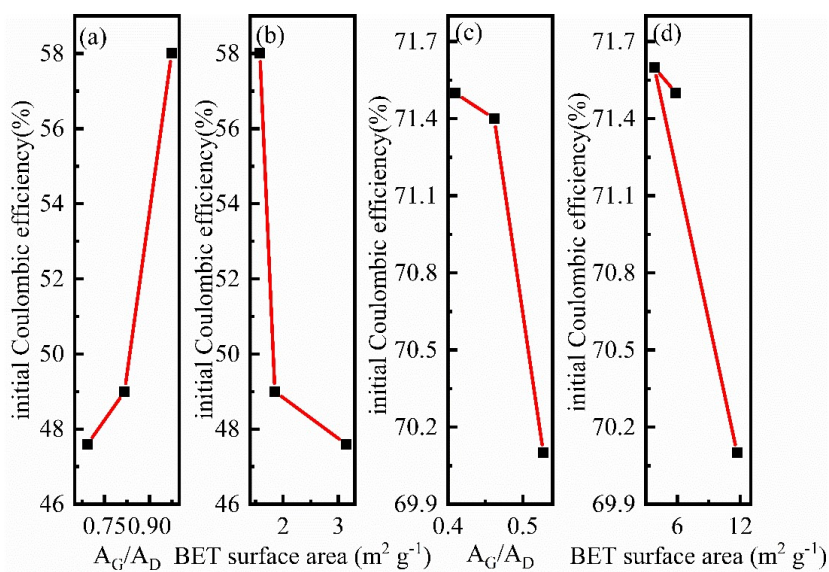

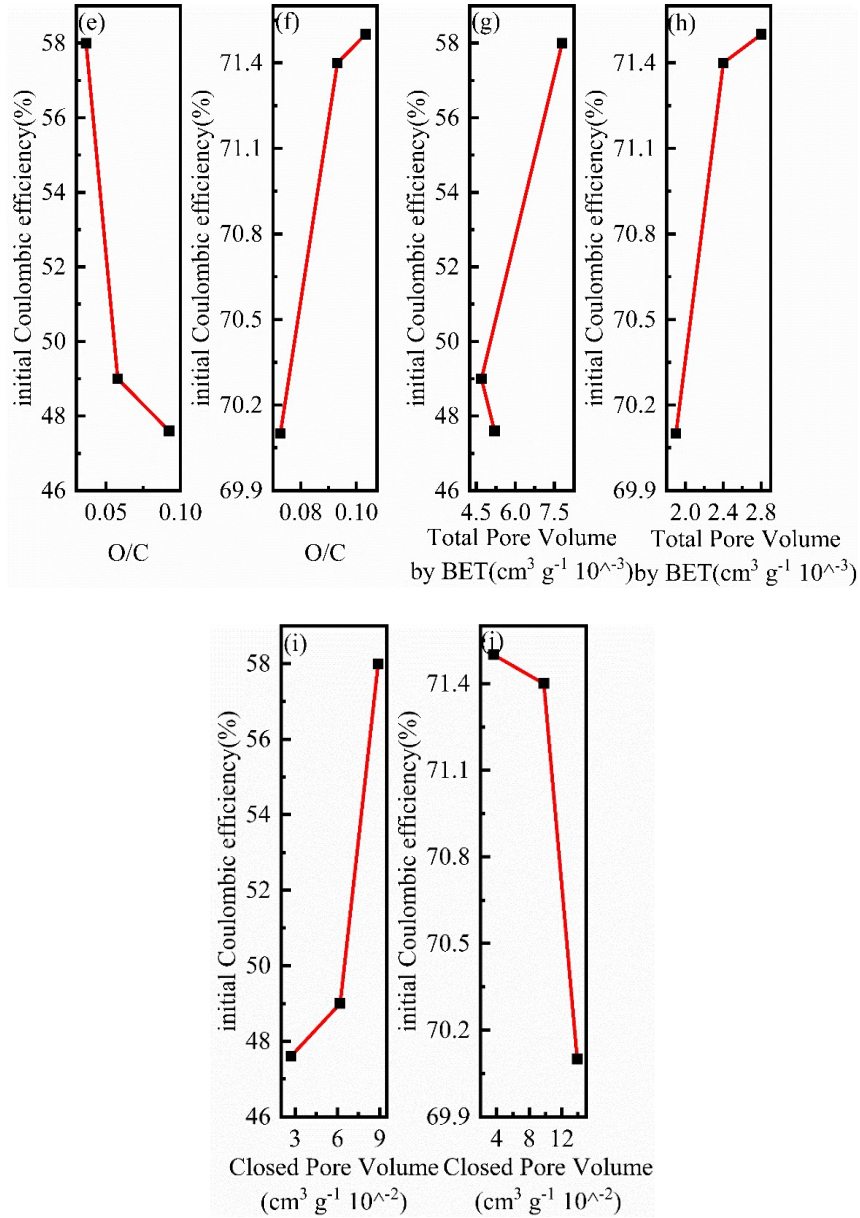

Fig.S9. Relation curve of ICEs and (a)  $A_G/A_D$  from the TF-HC and (b) BET surface areas for the TF-HC, (c)  $A_G/A_D$  for the MW-HC and (d) BET surface areas for the MW-HC, (e) the atomic ratios of oxygen over carbon for the TF-HC, (f) the atomic ratios of oxygen over carbon for the MW-HC, (g) open pore volume for TF-HC, (h) open pore volume for MW-HC, (i) closed pore volume for TF-HC, (j) closed pore volume for MW-HC.

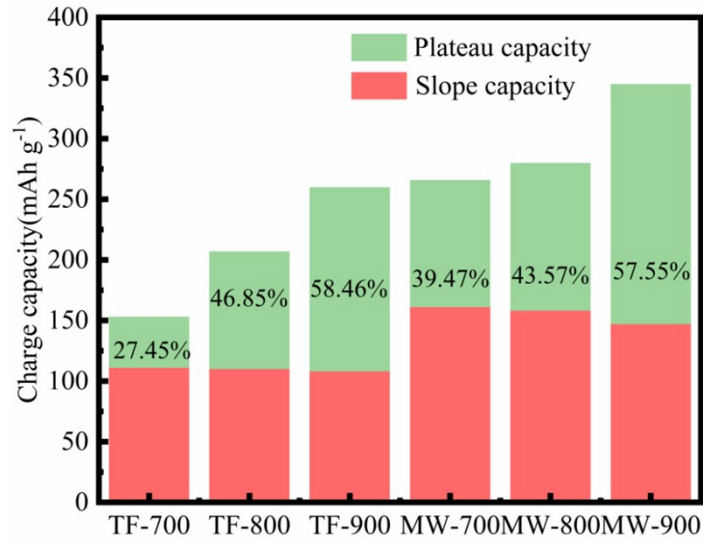

Fig.S10. Percentage of capacities in sloping and plateau regions for TF-HC and MW-HC

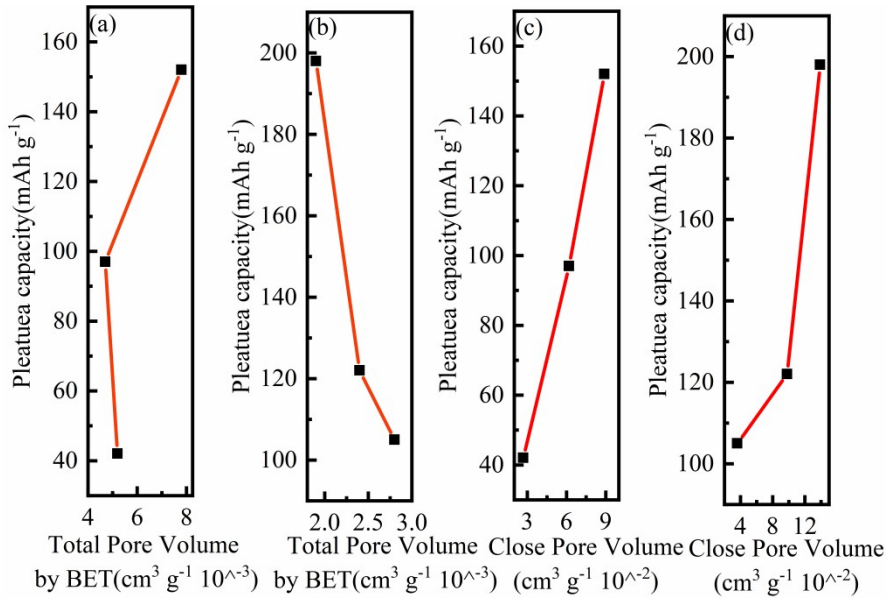

Fig.S11. Relation of open pore volume to plateau zone:(a) TF-HC, (b) MW-HC; Relation of closed pore volume to plateau zone: (c) TF-HC, (d) MW-HC.

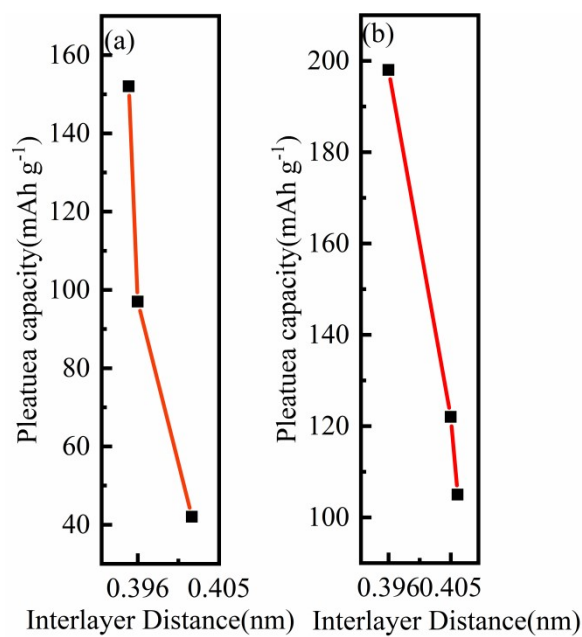

Fig.S12. Relationship between layer spacing and platform capacity for TF-HC and MW-HC

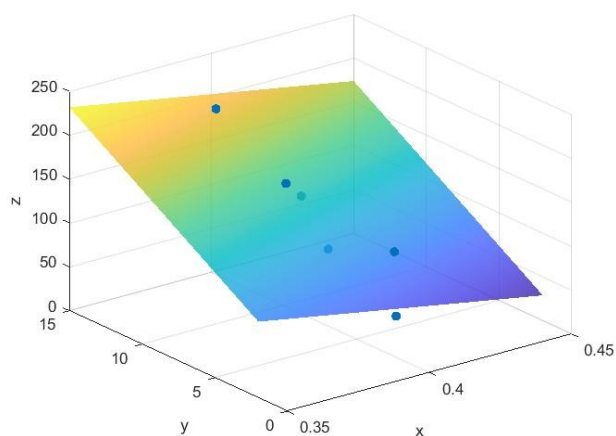

Fig.13. Coupling diagram of obturator and carbon layer spacing with plateau capacity

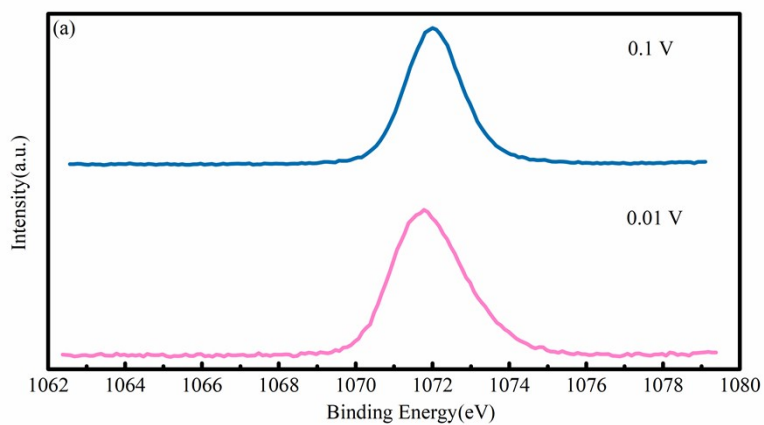



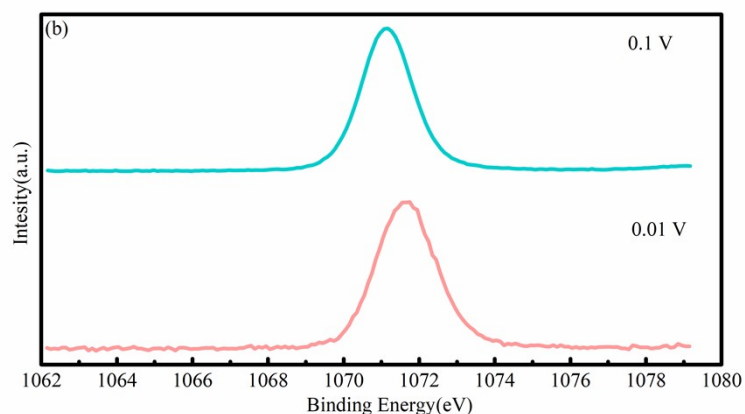

Fig.S14. Ex-situ XPS Na 1s spectra of a) TF-900, b) and MW-900 at different discharged states

Table-S1 Summary of data gleaned from the Raman spectra of MW-HC and TF-HC at different temperatures

| Sample | $C_{cr}(\%)$ | $C_{am}(\%)$ | $A_{D1}/A_G$ |
|--------|--------------|--------------|--------------|
| MW-700 | 61.32        | 38.68        | 2.44         |
| MW-800 | 60.13        | 39.87        | 2.165        |
| MW-900 | 66.26        | 33.73        | 1.896        |
| TF-700 | 75.53        | 24.47        | 1.427        |
| TF-800 | 76.19        | 20.81        | 1.262        |
| TF-900 | 77.54        | 22.46        | 0.998        |

Table-S2 Comparison among previous reported porous carbon electrodes for NIBs

| Reference                                 | Calcination temperature ( $^{\circ}\text{C}$ ) | Open pore information ( $\text{N}_2$ adsorption/desorption)                                      | Reversible capacity                                         | Ref. |
|-------------------------------------------|------------------------------------------------|--------------------------------------------------------------------------------------------------|-------------------------------------------------------------|------|
| This work                                 | 900                                            | SBET:12.1 $\text{m}^2\text{g}^{-1}$ ; $V_{\text{open pores}}$ :0.0019 $\text{cm}^3\text{g}^{-1}$ | 344 $\text{mAh g}^{-1}$<br>@20 $\text{mA g}^{-1}$<br>@70.1% | /    |
| Furfuryl alcohol derived spherical carbon | 1150                                           | SBET:480 $\text{m}^2\text{g}^{-1}$ ; $V_{\text{open pores}}$ :0.164 $\text{cm}^3\text{g}^{-1}$   | 223 $\text{mAh g}^{-1}$<br>@20 $\text{mA g}^{-1}$<br>@67.3% | 1    |
| Argan shells derived hard carbon          | 1300                                           | SBET:24 $\text{m}^2\text{g}^{-1}$ $V_{\text{open pores}}$ :0.18 $\text{cm}^3\text{g}^{-1}$       | 333 $\text{mAh g}^{-1}$<br>@25 $\text{mA g}^{-1}$<br>@67.8% | 2    |

|                                                                   |      |                                                                                         |       |                                                                          |   |
|-------------------------------------------------------------------|------|-----------------------------------------------------------------------------------------|-------|--------------------------------------------------------------------------|---|
| Lotus seedpod                                                     | 1200 | SBET:14.7 m <sup>2</sup> g <sup>-1</sup><br>pores: 0.22 cm <sup>3</sup> g <sup>-1</sup> | Vopen | 328 mAh g <sup>-1</sup><br>@50 mA g <sup>-1</sup><br><sup>1</sup> @50.4% | 3 |
| Sorghum stalk                                                     | 1300 | SBET: 85.5 m <sup>2</sup> g <sup>-1</sup>                                               |       | 245 mAh g <sup>-1</sup><br>@25mA g <sup>-1</sup><br><sup>1</sup> @62.2%  | 4 |
| Poly(styrene)<br>latexes-glucose<br>derived hollow<br>nanospheres | 1100 | SBET:410 m <sup>2</sup> g <sup>-1</sup>                                                 |       | 223 mAh g <sup>-1</sup><br>@50mA g <sup>-1</sup><br><sup>1</sup> @41.5%  | 5 |
| Cherry petals                                                     | 1000 | SBET:1.86 m <sup>2</sup> g <sup>-1</sup>                                                |       | 310 mAh g <sup>-1</sup><br>@20mA g <sup>-1</sup><br><sup>1</sup> @67.3%  | 6 |

Table-S3 Summary of data from the TF-900-CT and TF-900

| Slope capacity<br>(mAh g <sup>-1</sup> ) | Plateau capacity<br>(mAh g <sup>-1</sup> ) | Ture density<br>(He)<br>(g cm <sup>-3</sup> ) | Vclosed pore<br>(cm <sup>3</sup> g <sup>-1</sup> ) |
|------------------------------------------|--------------------------------------------|-----------------------------------------------|----------------------------------------------------|
| 150                                      | 166                                        | 1.79                                          | 0.116                                              |
| 151                                      | 109                                        | 1.88                                          | 0.089                                              |

Eq.S1 The calculation formula is as follows:

$$D = \frac{4}{\pi\tau} \left( \frac{m_B V_M}{M_B S} \right)^2 \frac{\Delta E_s}{\Delta E_\tau}$$

where  $\tau$  (sec) is the pulse time,  $S$  is the active surface area (cm<sup>2</sup>),  $m_B$ (g),  $M_B$ (g/mol) and  $V_M$  (cm<sup>3</sup>/mol) are the mass, molar mass and molar volume of CCs.  $\Delta E_s$  (V) and  $\Delta E_\tau$  (V) are voltage change caused by current pulse and galvanostatic discharge.

## References (supporting information)

- [1]Zhou D. H., Peer M., Yang Z. Z., Pol V. G. Long cycle life microporous spherical carbon anodes for sodium-ion batteries derived from furfuryl alcohol. *Journal of Materials Chemistry A*. 17(2016)6271-6275.
- [2]Xie F., Xu Z., Jensen A. C. S., Ding F. Unveiling the role of hydrothermal carbon dots as anodes in sodium-ion batteries with ultrahigh initial coulombic efficiency. *Journal of Materials Chemistry A*. 48(2019)27567-27575.
- [3]Dahbi M., Kiso M., Kubota K., Horiba T. Synthesis of hard carbon from argan shells for Na-ion batteries. *Journal of Materials Chemistry A*. 20(2017)9917-9928.
- [4]Wu F., Zhang M., Bai Y., Wang X. Lotus Seedpod-Derived hard carbon with hierarchical porous structure as stable anode for sodium-ion batteries. *ACS Applied Materials & Interfaces*. 13(2019)12554-12561.
- [5]Zhu X., Jiang X., Liu X., Xiao L. A green route to synthesize low-cost and high-performance hard carbon as promising sodium-ion battery anodes from sorghum stalk waste. *Green Energy & Environment*. 3(2017)310-315.
- [6]Zhu Z., Liang F., Zhou Z., Zeng X. Expanded biomass-derived hard carbon with ultrastable performance in sodium-ion batteries. *Journal of Materials Chemistry A*. 4(2018) 1513-1522.
